# Supplementary material for: Non-Renal Risk Factors for Chronic Kidney Disease in Liver Recipients with Functionally Intact Kidneys at 1 Month
Source: MDPI journal article supplement (doi:10.3390/jcm11144203), 2022-07-20

**Figure S1.** Graphic depiction of matching process according to presence or absence of post-transplant risk factors.

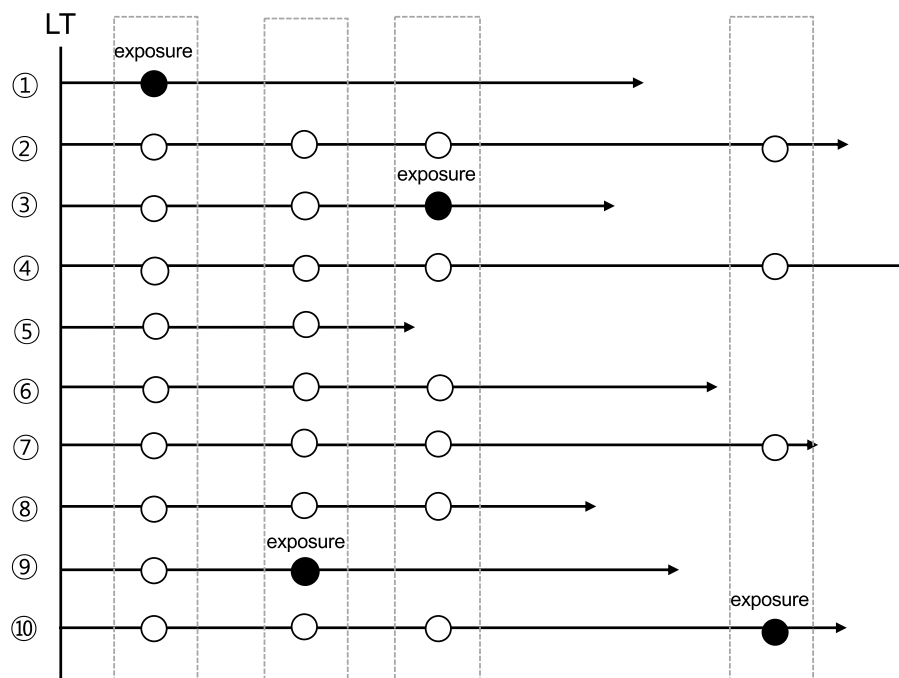

Black round means the first exposure to post-transplant risk factors in given patients. White round means potential control subjects for matching. Patients exposed to risk factors were matched to controls at 1:3 ratio on time-conditional propensity scores which was generated with baseline- and time-varying variables measured at each time points. From chronological matching process, patients selected as control group once were not considered as potential controls in further matching but were used again as risk group if appropriate.

LT, liver transplantation

**Figure S2.** Balance testing of propensity score-matched post-transplant risk factors.

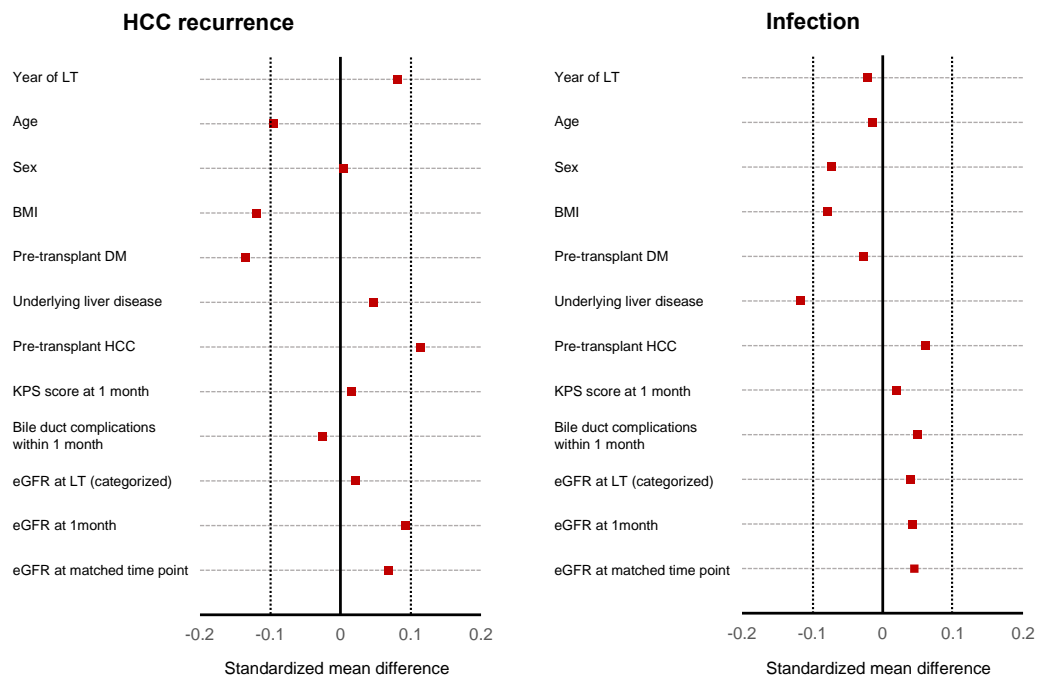

Standardized mean differences between -0.2 and 0.2 indicated adequate matching.

BMI, body mass index; DM, diabetes mellitus; HCC, hepatocellular carcinoma; KPS, Karnofsky performance status score; LT, liver transplantation

**Table S1.** Comparison of liver function 6 to 12 months after matched time points according to presence or absence of exposures.

| <b>Variables</b>       | <b>HCC recurrence<br/>(n=137)</b> | <b>No HCC<br/>recurrence<br/>(n=383)</b> | <b>P</b> |
|------------------------|-----------------------------------|------------------------------------------|----------|
| AST, U/L               | 32 (24-53)                        | 24 (19-33)                               | <0.01    |
| ALT, U/L               | 25 (17-44)                        | 20 (14-34)                               | <0.01    |
| INR                    | 1.0 (0.9-1.1)                     | 1.0 (0.9-1.1)                            | 0.51     |
| Total bilirubin, md/dL | 0.7 (0.5-0.9)                     | 0.7 (0.5-1.0)                            | 0.12     |

  

| <b>Variables</b>       | <b>Infection<br/>(n=369)</b> | <b>No infection<br/>(n=1073)</b> | <b>P</b> |
|------------------------|------------------------------|----------------------------------|----------|
| AST, U/L               | 28 (20-42)                   | 23 (18-33)                       | <0.01    |
| ALT, U/L               | 22 (13-43.8)                 | 19 (13-32)                       | <0.01    |
| INR                    | 1.0 (0.9-1.1)                | 1.0 (0.9-1.1)                    | 0.66     |
| Total bilirubin, md/dL | 0.7 (0.5-1.1)                | 0.7 (0.5-0.9)                    | 0.04     |

Data expressed as median (IQR) because variables were not normally distributed.

ALT, alanine aminotransferases; AST, aspartate aminotransferases; HCC, hepatocellular carcinoma; INR international normalized ratio; TAC, tacrolimus

**Table S2.** Baseline characteristics, postoperative events and immunosuppressants according to recurrence of HCC.

| <b>Variables</b>       | <b>No HCC<br/>recurrence<br/>(n=1001)</b> | <b>HCC<br/>recurrence<br/>(n=150)</b> | <b>P</b> |
|------------------------|-------------------------------------------|---------------------------------------|----------|
| Age, years             | 56.0 (51.0-61.0)                          | 55.0 (49.0-59.0)                      | 0.004    |
| Sex, female            | 175 (17.5)                                | 15 (10.0)                             | 0.029    |
| BMI, kg/m <sup>2</sup> | 24.2 (22.2-26.4)                          | 23.5 (21.8-25.6)                      | 0.016    |
| Donor type             |                                           |                                       | 0.392    |
| Living                 | 913 (91.2)                                | 133 (88.7)                            |          |
| Deceased               | 88 (8.8)                                  | 17 (11.3)                             |          |
| Donor age, years       | 30.0 (23.0-39.0)                          | 29.0 (23.0-42.0)                      | 0.900    |
| Donor sex, female      | 356 (35.6)                                | 60 (40.0)                             | 0.335    |
| ABO incompatibility    | 216 (21.6)                                | 38 (25.3)                             | 0.353    |

|                                    |                 |                 |       |
|------------------------------------|-----------------|-----------------|-------|
| Hypertension                       | 183 (18.3)      | 33 (22.0)       | 0.329 |
| Pre-transplant DM                  | 266 (26.6)      | 28 (18.7)       | 0.049 |
| MELD                               | 10.0 (8.0-14.0) | 10.0 (8.0-13.0) | 0.406 |
| KPS at 1 month                     |                 |                 | 0.560 |
| High (80-100%)                     | 405 (40.5)      | 55 (36.7)       |       |
| Intermediate (50-70%)              | 527 (52.6)      | 86 (57.3)       |       |
| Low (0-40%)                        | 69 (6.9)        | 9 (6.0)         |       |
| Basiliximab induction              | 904 (90.3)      | 139 (92.7)      | 0.439 |
| Immunosuppressants at 1 month      |                 |                 | 0.000 |
| Tacrolimus + Mycophenolate mofetil | 803 (80.2)      | 109 (73.2)      |       |
| Tacrolimus                         | 177 (17.7)      | 28 (18.8)       |       |
| Others                             | 21 (2.1)        | 12 (8.1)        |       |
| Tacrolimus trough level            |                 |                 |       |
| 1 month                            | 7.5 (5.7-9.6)   | 7.3 (5.5-10.1)  | 0.558 |
| 6 months                           | 6.7 (5.1-8.5)   | 5.6 (4.0-7.4)   | 0.000 |
| 12 months                          | 5.5 (4.3-7.3)   | 3.8 (2.2-6.0)   | 0.000 |
| Biopsy-proven rejection            | 81 (8.1)        | 15 (10.0)       | 0.529 |
| Bile duct complication             | 51 (5.1)        | 5 (3.3)         | 0.464 |
| Vascular complication              | 322 (32.2)      | 53 (35.3)       | 0.498 |
| Infection                          | 80 (8.0)        | 15 (10.0)       | 0.500 |

**Figure S3.** Distribution of tacrolimus trough level.

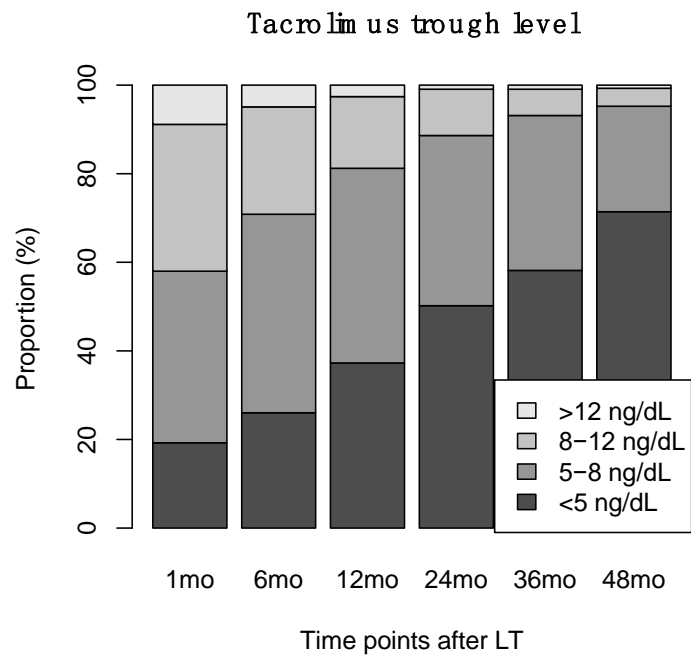

Supplement: s1 [file s1]
